# Supplementary material
Source: PubMed Central journal article supplement (PMC7919144)
Supplement: AnnalsATS.202003-220OC_op+de+beeck_data_supplement.pdf [file AnnalsATS.202003-220OC_op%2Bde%2Bbeeck_data_supplement.pdf]

# Mandibular Advancement Device Treatment Efficacy is Associated with Polysomnographic Endotypes

## Online Supplement

Sara Op de Beeck MSc<sup>\*1, 3, 6</sup>, Marijke Dieltjens PhD<sup>1, 5, 6</sup>, Ali Azarbarzin PhD<sup>2</sup>, Marc Willemen MSc<sup>3</sup>, Johan Verbraecken PhD<sup>1, 3, 4</sup>, Marc J. Braem PhD<sup>1, 5</sup>, Andrew Wellman PhD<sup>2</sup>, Scott A. Sands PhD<sup>2°</sup>, Olivier M. Vanderveken PhD<sup>1, 3, 6°</sup>

°Equal contributions

<sup>1</sup> Faculty of Medicine and Health Sciences, University of Antwerp, Wilrijk, Belgium

<sup>2</sup> Division of Sleep and Circadian Disorders, Brigham and Women's Hospital and Harvard Medical School, Boston, MA, United States,

<sup>3</sup> Multidisciplinary Sleep Disorders Centre, Antwerp University Hospital, Edegem, Belgium,

<sup>4</sup> Department of Pulmonology, Antwerp University Hospital, Edegem, Antwerp, Belgium,

<sup>5</sup> Special Dentistry Care, Antwerp University Hospital, Edegem, Belgium,

<sup>6</sup> ENT, Head and Neck Surgery, Antwerp University Hospital, Edegem, Belgium

### \*Corresponding author:

Sara Op de Beeck  
Translational Neurosciences  
Faculty of Medicine and Health Sciences  
University of Antwerp  
Universiteitsplein 1 – D.T.494  
2610 Wilrijk  
BELGIUM  
Email: [sara.opdebeeck@uantwerpen.be](mailto:sara.opdebeeck@uantwerpen.be)

## Supplemental Figures

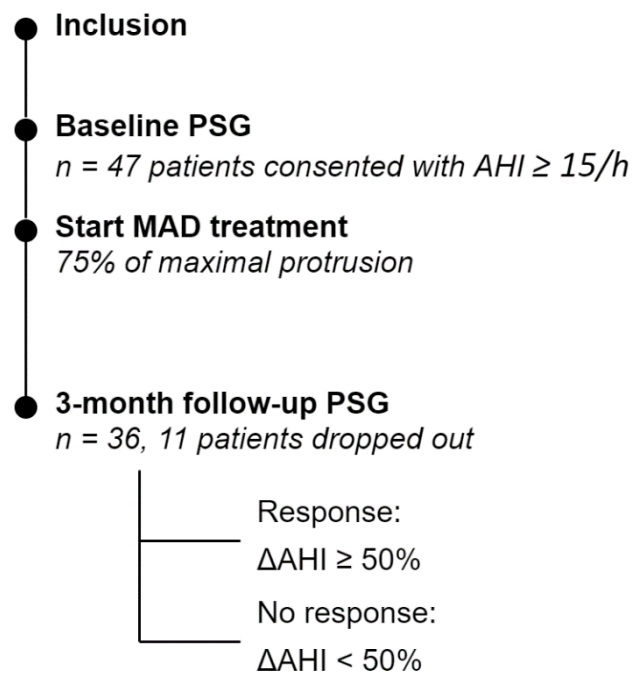

**Figure E1:** Study protocol.

PSG: polysomnography, MAD: mandibular advancement device, AHI: apnea-hypopnea index
